# Supplementary material for: A new melilite-type rare-earth borate CdTbGaB2O7 and multicolor tunable emission in the CdTb1−xSmxGaB2O7 (0 ≤ x ≤ 0.2) phosphors
Source: Royal Society of Chemistry journal article supplement (doi:10.1039/d3ra03002d), 2023-01-01
Supplement: d3ra03002d1.pdf [file d3ra03002d1.pdf]

## Supporting Information

# A new melilite-type rare-earth borate CdTbGaB<sub>2</sub>O<sub>7</sub> and multicolor tunable emission in the CdTb<sub>1-x</sub>Sm<sub>x</sub>GaB<sub>2</sub>O<sub>7</sub> (0 ≤ x ≤ 0.2) phosphors

Xuean Chen<sup>a,\*</sup>, Jinyuan Zhang<sup>a</sup>, Weiqiang Xiao<sup>b</sup> and Xiaoyan Song<sup>a</sup>

<sup>a</sup>Faculty of Materials and Manufacturing, Key Laboratory of Advanced Functional Materials, Ministry of Education of China, Beijing University of Technology, 100124 Beijing, China

<sup>b</sup>Beijing Key Laboratory of Microstructure and Property of Solids, Beijing University of Technology, 100124 Beijing, China

### Contents:

1. **Table S1** Atomic coordinates, site occupancies, and equivalent isotropic displacement parameters  $U_{eq}$  (Å<sup>2</sup>) of CdTbGaB<sub>2</sub>O<sub>7</sub> with standard deviations in parentheses.
2. **Table S2** Anisotropic displacement parameters  $U_{ij}$  (Å<sup>2</sup>) of CdTbGaB<sub>2</sub>O<sub>7</sub> with standard deviations in parentheses.
3. **Table S3** Selected bond lengths (Å) and angles (°) for CdTbGaB<sub>2</sub>O<sub>7</sub>.
4. **Table S4** Correlation table of the internal and external modes of B<sub>2</sub>O<sub>7</sub> “pyro” units between the site group of the molecule (C<sub>2v</sub>) and the factor group of the crystal (D<sub>2d</sub>).
5. **Table S5** Rietveld refinement results of CdTb<sub>1-x</sub>Sm<sub>x</sub>GaB<sub>2</sub>O<sub>7</sub> (0 ≤ x ≤ 1).
6. **Table S6** Atomic coordinates, occupancy factors, and isotropic thermal displacement factors obtained from the Rietveld refinements for CdTb<sub>1-x</sub>Sm<sub>x</sub>GaB<sub>2</sub>O<sub>7</sub> (0 ≤ x ≤ 1).
7. **Fig. S1** A FE-SEM image, typical EDX results, and elemental mapping of the CdTbGaB<sub>2</sub>O<sub>7</sub> single-crystal.
8. **Fig. S2** Infrared and Raman spectra of CdTbGaB<sub>2</sub>O<sub>7</sub> and CdSmGaB<sub>2</sub>O<sub>7</sub>.
9. **Fig. S3** UV–vis absorption spectra of CdTbGaB<sub>2</sub>O<sub>7</sub> (a) and CdSmGaB<sub>2</sub>O<sub>7</sub> (b).
10. **Fig. S4** Rietveld refinements of powder X-ray diffractograms of the CdTb<sub>1-x</sub>Sm<sub>x</sub>GaB<sub>2</sub>O<sub>7</sub> (x = 0.001, 0.002, 0.005, 0.01, 0.05, 0.1, and 0.2) solid solutions.
11. **Fig. S5** Survey (a) and core-level spectra of Cd 3d (b), Tb 3d (c), Sm 4d (d), Ga 3p (e), B 1s (f) and O 1s (g) for CdTb<sub>0.995</sub>Sm<sub>0.005</sub>GaB<sub>2</sub>O<sub>7</sub>.
12. **Fig. S6** The excitation line of BaSO<sub>4</sub> reference and the PL spectrum of the CdTb<sub>0.995</sub>Sm<sub>0.005</sub>GaB<sub>2</sub>O<sub>7</sub> phosphor collected using an integrating sphere ( $\lambda_{ex}$  = 370 nm).

**Table S1**

Atomic coordinates, site occupancies, and equivalent isotropic displacement parameters  $U_{\text{eq}}$  ( $\text{\AA}^2$ ) of  $\text{CdTbGaB}_2\text{O}_7$  with standard deviations in parentheses.

| Atoms   | Wyck sites | Site symmetry | X          | Y          | Z          | Occupancies | $U_{\text{eq}}$ |
|---------|------------|---------------|------------|------------|------------|-------------|-----------------|
| Cd1/Tb1 | 4e         | $C_s$         | 0.83827(3) | 0.33827(3) | 0.49097(7) | 0.5/0.5     | 0.00997(10)     |
| Ga1     | 2a         | $S_4$         | 1.0000     | 0.0000     | 0.0000     | 1           | 0.00576(14)     |
| B1      | 4e         | $C_s$         | 0.8658(6)  | 0.6343(6)  | 0.9369(12) | 1           | 0.0069(9)       |
| O1      | 2c         | $C_{2v}$      | 1.0000     | 0.5000     | 0.8248(12) | 1           | 0.0119(12)      |
| O2      | 8f         | $C_1$         | 0.8095(4)  | 0.0798(4)  | 0.2140(7)  | 1           | 0.0109(6)       |
| O3      | 4e         | $C_s$         | 0.8568(5)  | 0.6432(5)  | 0.2366(8)  | 1           | 0.0139(8)       |

Note:  $U_{\text{eq}}$  is defined as one third of the trace of the orthogonalized  $U_{ij}$  tensor.

**Table S2**

Anisotropic displacement parameters  $U_{ij}$  ( $\text{\AA}^2$ ) of  $\text{CdTbGaB}_2\text{O}_7$  with standard deviations in parentheses.

| Atoms   | $U_{11}$    | $U_{22}$    | $U_{33}$    | $U_{23}$     | $U_{13}$     | $U_{12}$    |
|---------|-------------|-------------|-------------|--------------|--------------|-------------|
| Cd1/Tb1 | 0.01079(11) | 0.01079(11) | 0.00832(13) | -0.00376(10) | -0.00376(10) | 0.00176(10) |
| Ga1     | 0.00614(19) | 0.00614(19) | 0.0050(3)   | 0.000        | 0.000        | 0.000       |
| B1      | 0.0068(13)  | 0.0068(13)  | 0.007(2)    | 0.0001(12)   | -0.0001(12)  | -0.0015(17) |
| O1      | 0.0154(18)  | 0.0154(18)  | 0.005(2)    | 0.000        | 0.000        | 0.013(3)    |
| O2      | 0.0088(13)  | 0.0155(14)  | 0.0085(11)  | -0.0030(10)  | 0.0009(11)   | 0.0032(11)  |
| O3      | 0.0190(14)  | 0.0190(14)  | 0.0036(14)  | -0.0020(10)  | 0.0020(10)   | 0.0059(19)  |

**Table S3**

Selected bond lengths ( $\text{\AA}$ ) and angles ( $^\circ$ ) for  $\text{CdTbGaB}_2\text{O}_7$ .

|                       |            |                     |          |
|-----------------------|------------|---------------------|----------|
| Cd1/Tb1-O1            | 2.305(4)   | Ga1-O2 $\times$ 4   | 1.824(3) |
| Cd1/Tb1-O2 $\times$ 2 | 2.316(3)   |                     |          |
| Cd1/Tb1-O3            | 2.401(4)   | B1-O3               | 1.419(7) |
| Cd1/Tb1-O2 $\times$ 2 | 2.505(3)   | B1-O1               | 1.492(7) |
| Cd1/Tb1-O3 $\times$ 2 | 2.547(3)   | B1-O2 $\times$ 2    | 1.525(5) |
| Mean                  | 2.430      | Mean                | 1.490    |
| O2-Ga1-O2 $\times$ 4  | 107.90(10) | O3-B1-O2 $\times$ 2 | 116.1(3) |
| O2-Ga1-O2 $\times$ 2  | 112.7(2)   | O1-B1-O2 $\times$ 2 | 102.6(3) |
| Mean                  | 109.5      | O2-B1-O2            | 102.9(4) |
| O3-B1-O1              | 114.6(5)   | Mean                | 109.15   |

**Table S4**

Correlation table of the internal and external modes of B<sub>2</sub>O<sub>7</sub> “pyro” units between the site group of the molecule (C<sub>2v</sub>) and the factor group of the crystal (D<sub>2d</sub>).

| Species                            | Assignment                                                               | site group symmetry                                                            | Factor group symmetry           |
|------------------------------------|--------------------------------------------------------------------------|--------------------------------------------------------------------------------|---------------------------------|
|                                    |                                                                          | C <sub>2v</sub>                                                                | D <sub>2d</sub>                 |
| B <sub>2</sub> O <sub>7</sub>      | v <sub>s</sub> (BO <sub>3</sub> )                                        | A <sub>1</sub>                                                                 | A <sub>1</sub> + B <sub>2</sub> |
|                                    |                                                                          | B <sub>1</sub>                                                                 | E                               |
|                                    | v <sub>as</sub> (BO <sub>3</sub> )                                       | A <sub>1</sub>                                                                 | A <sub>1</sub> + B <sub>2</sub> |
|                                    |                                                                          | A <sub>2</sub>                                                                 | A <sub>2</sub> + B <sub>1</sub> |
|                                    |                                                                          | B <sub>1</sub>                                                                 | E                               |
|                                    | v <sub>s</sub> (B <sup>o</sup> B)                                        | B <sub>2</sub>                                                                 | E                               |
|                                    |                                                                          | A <sub>1</sub>                                                                 | A <sub>1</sub> + B <sub>2</sub> |
|                                    |                                                                          | B <sub>1</sub>                                                                 | E                               |
|                                    | v <sub>as</sub> (B <sup>o</sup> B)                                       | A <sub>1</sub>                                                                 | A <sub>1</sub> + B <sub>2</sub> |
|                                    |                                                                          | A <sub>2</sub>                                                                 | A <sub>2</sub> + B <sub>1</sub> |
|                                    | δ(B <sup>o</sup> B)                                                      | B <sub>2</sub>                                                                 | E                               |
|                                    |                                                                          | A <sub>1</sub>                                                                 | A <sub>1</sub> + B <sub>2</sub> |
|                                    | ρ(BO <sub>3</sub> )                                                      | A <sub>2</sub>                                                                 | A <sub>2</sub> + B <sub>1</sub> |
| B <sub>2</sub>                     |                                                                          | E                                                                              |                                 |
| δ(BO <sub>3</sub> )                | 3A <sub>1</sub> + 2A <sub>2</sub> + 3B <sub>1</sub> + 2B <sub>2</sub>    | 3A <sub>1</sub> + 2A <sub>2</sub> + 2B <sub>1</sub> + 3B <sub>2</sub> + 5E     |                                 |
| T'(B <sub>2</sub> O <sub>7</sub> ) | A <sub>1</sub> + B <sub>1</sub> + B <sub>2</sub>                         | A <sub>1</sub> + B <sub>2</sub> + 2E                                           |                                 |
| L(B <sub>2</sub> O <sub>7</sub> )  | A <sub>2</sub> + B <sub>1</sub> + B <sub>2</sub>                         | A <sub>2</sub> + B <sub>1</sub> + 2E                                           |                                 |
| Γ                                  | <b>8A<sub>1</sub> + 5A<sub>2</sub> + 8B<sub>1</sub> + 6B<sub>2</sub></b> | <b>8A<sub>1</sub> + 5A<sub>2</sub> + 5B<sub>1</sub> + 8B<sub>2</sub> + 14E</b> |                                 |

Note: v<sub>s</sub>, symmetric stretching; v<sub>as</sub>, antisymmetric stretching; δ, bending; ρ, rocking; T', translational mode; L, librational mode; Γ, irreducible representation.

**Table S5**Rietveld refinement results of CdTb<sub>1-x</sub>Sm<sub>x</sub>GaB<sub>2</sub>O<sub>7</sub> (0 ≤ x ≤ 1).

| Sm <sup>3+</sup> content   | x=0                          | x=0.001                      | x=0.002                      | x=0.005                      | x=0.01                       | x=0.05                       | x=0.1                        | x=0.2                        | x=1                          |
|----------------------------|------------------------------|------------------------------|------------------------------|------------------------------|------------------------------|------------------------------|------------------------------|------------------------------|------------------------------|
| Space group                | <i>PError!2<sub>1</sub>m</i> | <i>PError!2<sub>1</sub>m</i> | <i>PError!2<sub>1</sub>m</i> | <i>PError!2<sub>1</sub>m</i> | <i>PError!2<sub>1</sub>m</i> | <i>PError!2<sub>1</sub>m</i> | <i>PError!2<sub>1</sub>m</i> | <i>PError!2<sub>1</sub>m</i> | <i>PError!2<sub>1</sub>m</i> |
| <i>a</i> (Å)               | 7.34374(10)                  | 7.34419(13)                  | 7.34398(9)                   | 7.34405(8)                   | 7.34421(12)                  | 7.34551(13)                  | 7.34683(12)                  | 7.34907(12)                  | 7.37531(10)                  |
| <i>c</i> (Å)               | 4.72012(8)                   | 4.72007(10)                  | 4.72025(7)                   | 4.72030(7)                   | 4.72100(10)                  | 4.72210(10)                  | 4.72337(10)                  | 4.72619(10)                  | 4.75700(8)                   |
| <i>V</i> (Å <sup>3</sup> ) | 254.558(8)                   | 254.587(10)                  | 254.582(7)                   | 254.590(7)                   | 254.639(10)                  | 254.788(11)                  | 254.948(10)                  | 255.257(10)                  | 258.758(9)                   |
| 2θ range (°)               | 5-80                         | 5-80                         | 5-80                         | 5-80                         | 5-80                         | 5-80                         | 5-80                         | 5-80                         | 5-80                         |
| R <sub>p</sub> , %         | 2.30                         | 2.54                         | 2.34                         | 2.33                         | 2.63                         | 2.68                         | 2.54                         | 2.66                         | 3.02                         |
| R <sub>wp</sub> , %        | 3.51                         | 3.91                         | 3.56                         | 3.51                         | 4.09                         | 4.23                         | 3.92                         | 4.00                         | 4.91                         |
| GOF                        | 2.03                         | 2.14                         | 2.00                         | 2.02                         | 2.40                         | 2.43                         | 2.21                         | 2.33                         | 2.45                         |

**Table S6**

Atomic coordinates, occupancy factors, and isotropic thermal displacement factors obtained from the Rietveld refinements for  $\text{CdTb}_{1-x}\text{Sm}_x\text{GaB}_2\text{O}_7$  ( $0 \leq x \leq 1$ ).

| $\text{CdTbGaB}_2\text{O}_7$                                 | $x$         | $y$         | $z$       | Occ.              | $B_{\text{eq}}$  |
|--------------------------------------------------------------|-------------|-------------|-----------|-------------------|------------------|
| Cd1/Tb1                                                      | 0.83725(14) | 0.33725(14) | 0.4890(7) | 0.5/0.5           | 0.7872           |
| Ga1                                                          | 1.00000     | 0.00000     | 0.00000   | 1                 | 0.4548           |
| B1                                                           | 0.86580     | 0.63430     | 0.93690   | 1                 | 0.5448           |
| O1                                                           | 1.00000     | 0.50000     | 0.82480   | 1                 | 0.9396           |
| O2                                                           | 0.80950     | 0.07980     | 0.21400   | 1                 | 0.8606           |
| O3                                                           | 0.85680     | 0.64320     | 0.23660   | 1                 | 1.098            |
| $\text{CdTb}_{0.999}\text{Sm}_{0.001}\text{GaB}_2\text{O}_7$ | $x$         | $y$         | $z$       | Occ.              | $B_{\text{eq}}$  |
| Cd1/Tb1/Sm1                                                  | 0.83715(18) | 0.33715(18) | 0.4883(9) | 0.5/0.4995/0.0005 | 0.7872           |
| Ga1                                                          | 1.00000     | 0.00000     | 0.00000   | 1                 | 0.4548           |
| B1                                                           | 0.86580     | 0.63430     | 0.93690   | 1                 | 0.5448           |
| O1                                                           | 1.00000     | 0.50000     | 0.82480   | 1                 | 0.9396           |
| O2                                                           | 0.80950     | 0.07980     | 0.21400   | 1                 | 0.8606           |
| O3                                                           | 0.85680     | 0.64320     | 0.23660   | 1                 | 1.098            |
| $\text{CdTb}_{0.998}\text{Sm}_{0.002}\text{GaB}_2\text{O}_7$ | $x$         | $y$         | $z$       | Occ.              | $B_{\text{eq}}$  |
| Cd1/Tb1/Sm1                                                  | 0.83727(14) | 0.33727(14) | 0.4888(7) | 0.5/0.499/0.001   | 0.7872           |
| Ga1                                                          | 1.00000     | 0.00000     | 0.00000   | 1                 | 0.4548           |
| B1                                                           | 0.86580     | 0.63430     | 0.93690   | 1                 | 0.5448           |
| O1                                                           | 1.00000     | 0.50000     | 0.82480   | 1                 | 0.9396           |
| O2                                                           | 0.80950     | 0.07980     | 0.21400   | 1                 | 0.8606           |
| O3                                                           | 0.85680     | 0.64320     | 0.23660   | 1                 | 1.098            |
| $\text{CdTb}_{0.995}\text{Sm}_{0.005}\text{GaB}_2\text{O}_7$ | $x$         | $y$         | $z$       | Occ.              | $U_{\text{iso}}$ |
| Cd1/Tb1/Sm1                                                  | 0.83748(16) | 0.33748(16) | 0.4909(7) | 0.5/0.4975/0.0025 | 0.7872           |
| Ga1                                                          | 1.00000     | 0.00000     | 0.00000   | 1                 | 0.4548           |
| B1                                                           | 0.86580     | 0.63430     | 0.93690   | 1                 | 0.5448           |
| O1                                                           | 1.00000     | 0.50000     | 0.82480   | 1                 | 0.9396           |
| O2                                                           | 0.80950     | 0.07980     | 0.21400   | 1                 | 0.8606           |
| O3                                                           | 0.85680     | 0.64320     | 0.23660   | 1                 | 1.098            |
| $\text{CdTb}_{0.99}\text{Sm}_{0.01}\text{GaB}_2\text{O}_7$   | $x$         | $y$         | $z$       | Occ.              | $U_{\text{iso}}$ |
| Cd1/Tb1/Sm1                                                  | 0.83705(17) | 0.33705(17) | 0.4877(8) | 0.5/0.495/0.005   | 0.7872           |
| Ga1                                                          | 1.00000     | 0.00000     | 0.00000   | 1                 | 0.4548           |
| B1                                                           | 0.86580     | 0.63430     | 0.93690   | 1                 | 0.5448           |
| O1                                                           | 1.00000     | 0.50000     | 0.82480   | 1                 | 0.9396           |
| O2                                                           | 0.80950     | 0.07980     | 0.21400   | 1                 | 0.8606           |
| O3                                                           | 0.85680     | 0.64320     | 0.23660   | 1                 | 1.098            |

| $\text{CdTb}_{0.95}\text{Sm}_{0.05}\text{GaB}_2\text{O}_7$ | $x$         | $y$         | $z$       | Occ.            | $U_{\text{iso.}}$ |
|------------------------------------------------------------|-------------|-------------|-----------|-----------------|-------------------|
| Cd1/Tb1/Sm1                                                | 0.83707(18) | 0.33707(18) | 0.4885(9) | 0.5/0.475/0.025 | 0.7872            |
| Ga1                                                        | 1.00000     | 0.00000     | 0.00000   | 1               | 0.4548            |
| B1                                                         | 0.86580     | 0.63430     | 0.93690   | 1               | 0.5448            |
| O1                                                         | 1.00000     | 0.50000     | 0.82480   | 1               | 0.9396            |
| O2                                                         | 0.80950     | 0.07980     | 0.21400   | 1               | 0.8606            |
| O3                                                         | 0.85680     | 0.64320     | 0.23660   | 1               | 1.098             |
| $\text{CdTb}_{0.9}\text{Sm}_{0.1}\text{GaB}_2\text{O}_7$   | $x$         | $y$         | $z$       | Occ.            | $U_{\text{iso.}}$ |
| Cd1/Tb1/Sm1                                                | 0.83705(17) | 0.33705(17) | 0.4873(8) | 0.5/0.45/0.05   | 0.7872            |
| Ga1                                                        | 1.00000     | 0.00000     | 0.00000   | 1               | 0.4548            |
| B1                                                         | 0.86580     | 0.63430     | 0.93690   | 1               | 0.5448            |
| O1                                                         | 1.00000     | 0.50000     | 0.82480   | 1               | 0.9396            |
| O2                                                         | 0.80950     | 0.07980     | 0.21400   | 1               | 0.8606            |
| O3                                                         | 0.85680     | 0.64320     | 0.23660   | 1               | 1.098             |
| $\text{CdTb}_{0.8}\text{Sm}_{0.2}\text{GaB}_2\text{O}_7$   | $x$         | $y$         | $z$       | Occ.            | $U_{\text{iso.}}$ |
| Cd1/Tb1/Sm1                                                | 0.83706(17) | 0.33706(17) | 0.4888(8) | 0.5/0.4/0.1     | 0.7872            |
| Ga1                                                        | 1.00000     | 0.00000     | 0.00000   | 1               | 0.4548            |
| B1                                                         | 0.86580     | 0.63430     | 0.93690   | 1               | 0.5448            |
| O1                                                         | 1.00000     | 0.50000     | 0.82480   | 1               | 0.9396            |
| O2                                                         | 0.80950     | 0.07980     | 0.21400   | 1               | 0.8606            |
| O3                                                         | 0.85680     | 0.64320     | 0.23660   | 1               | 1.098             |
| $\text{CdSmGaB}_2\text{O}_7$                               | $x$         | $y$         | $z$       | Occ.            | $U_{\text{iso.}}$ |
| Cd1/Sm1                                                    | 0.83681(18) | 0.33681(18) | 0.4892(9) | 0.5/0.5         | 0.7872            |
| Ga1                                                        | 1.00000     | 0.00000     | 0.00000   | 1               | 0.4548            |
| B1                                                         | 0.86580     | 0.63430     | 0.93690   | 1               | 0.5448            |
| O1                                                         | 1.00000     | 0.50000     | 0.82480   | 1               | 0.9396            |
| O2                                                         | 0.80950     | 0.07980     | 0.21400   | 1               | 0.8606            |
| O3                                                         | 0.85680     | 0.64320     | 0.23660   | 1               | 1.098             |

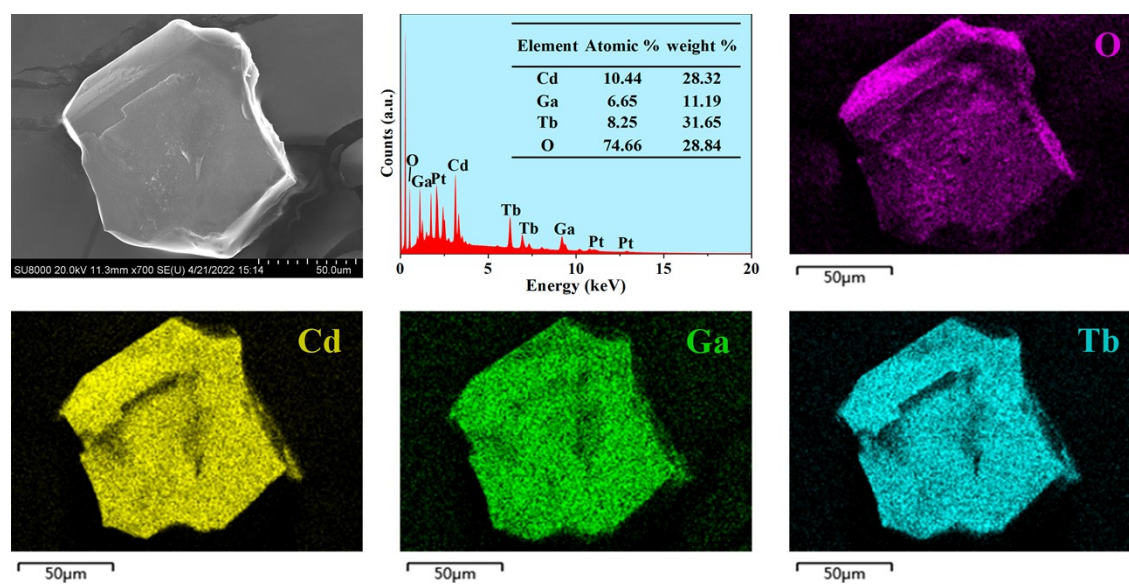

**Fig. S1** A FE-SEM image, typical EDX results, and elemental mapping of the CdTbGaB<sub>2</sub>O<sub>7</sub> single-crystal. Pt element comes from the pretreatment process (A thin layer of Pt was evaporated on the sample surface to provide electrical conductivity).

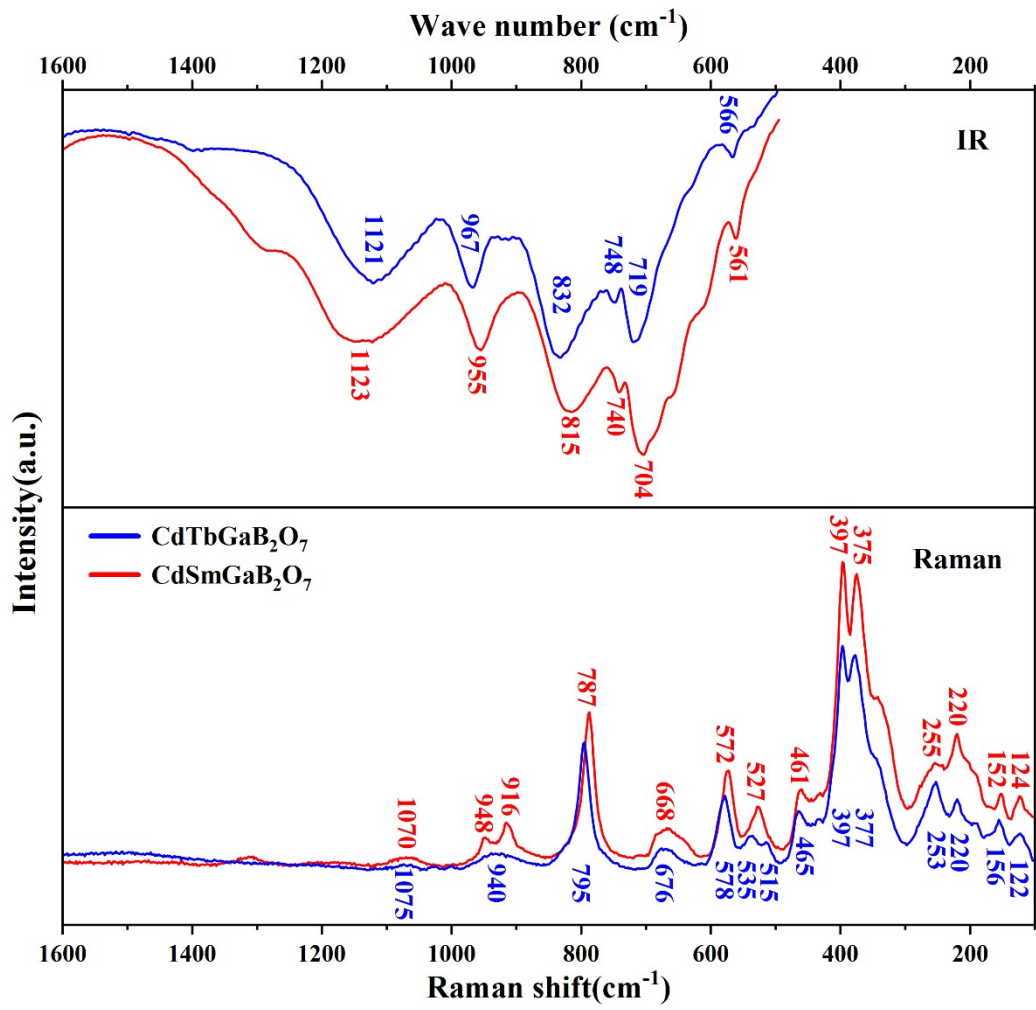

Fig. S2 Infrared and Raman spectra of CdTbGaB<sub>2</sub>O<sub>7</sub> and CdSmGaB<sub>2</sub>O<sub>7</sub>.



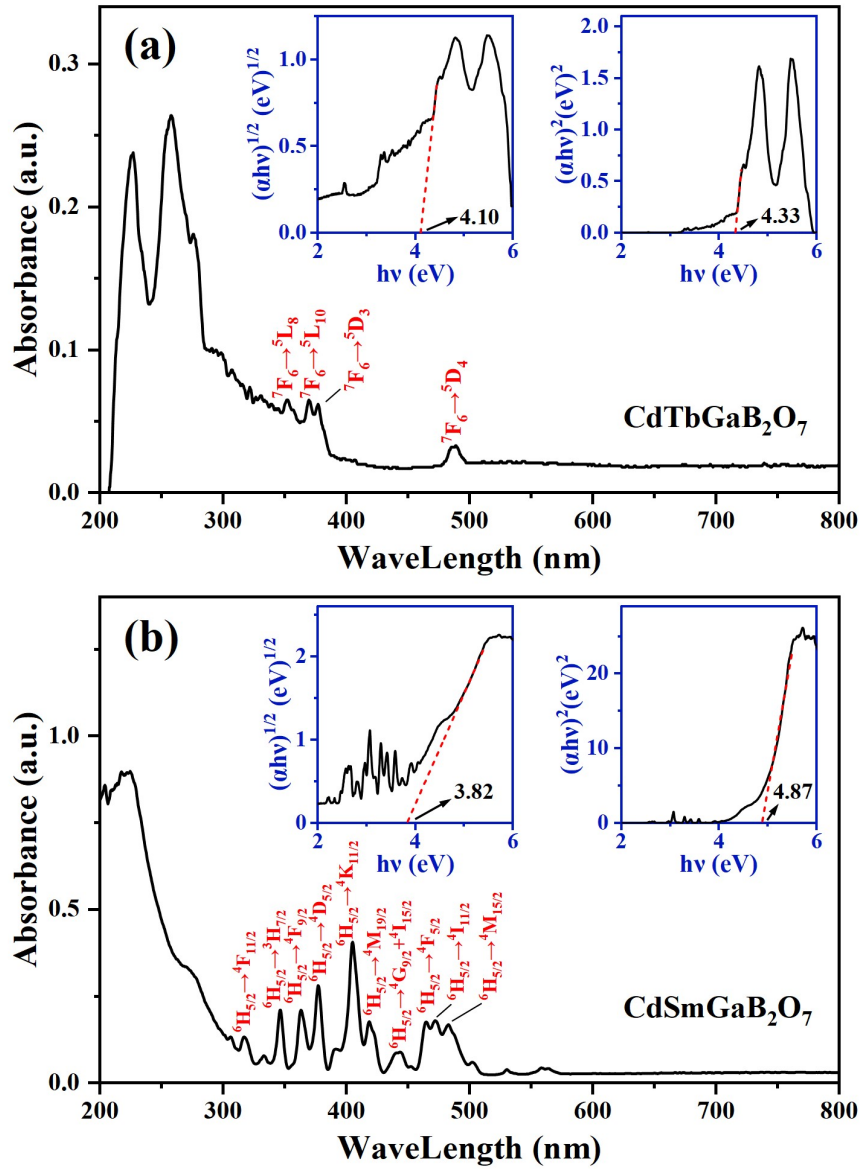

**Fig. S3** UV-vis absorption spectra of  $\text{CdTbGaB}_2\text{O}_7$  (a) and  $\text{CdSmGaB}_2\text{O}_7$  (b). The insets show the Tauc plots from indirect (left) and direct (right) transitions.

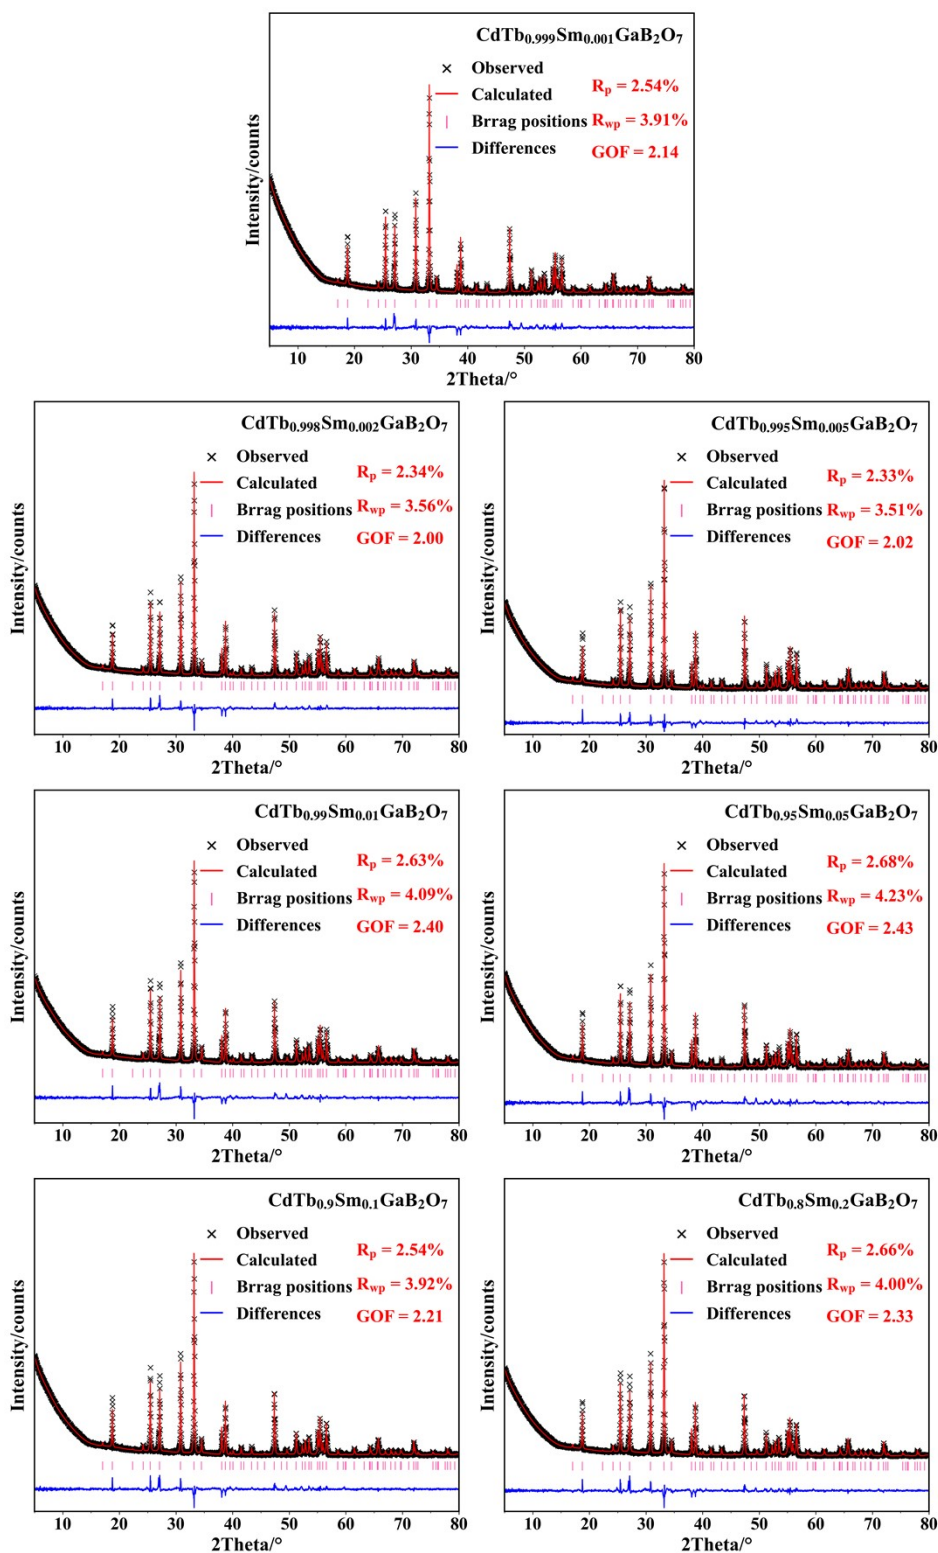

**Fig. S4** Rietveld refinements of powder X-ray diffractograms of the  $\text{CdTb}_{1-x}\text{Sm}_x\text{GaB}_2\text{O}_7$  ( $x = 0.001, 0.002, 0.005, 0.01, 0.05, 0.1, \text{ and } 0.2$ ) solid solutions.

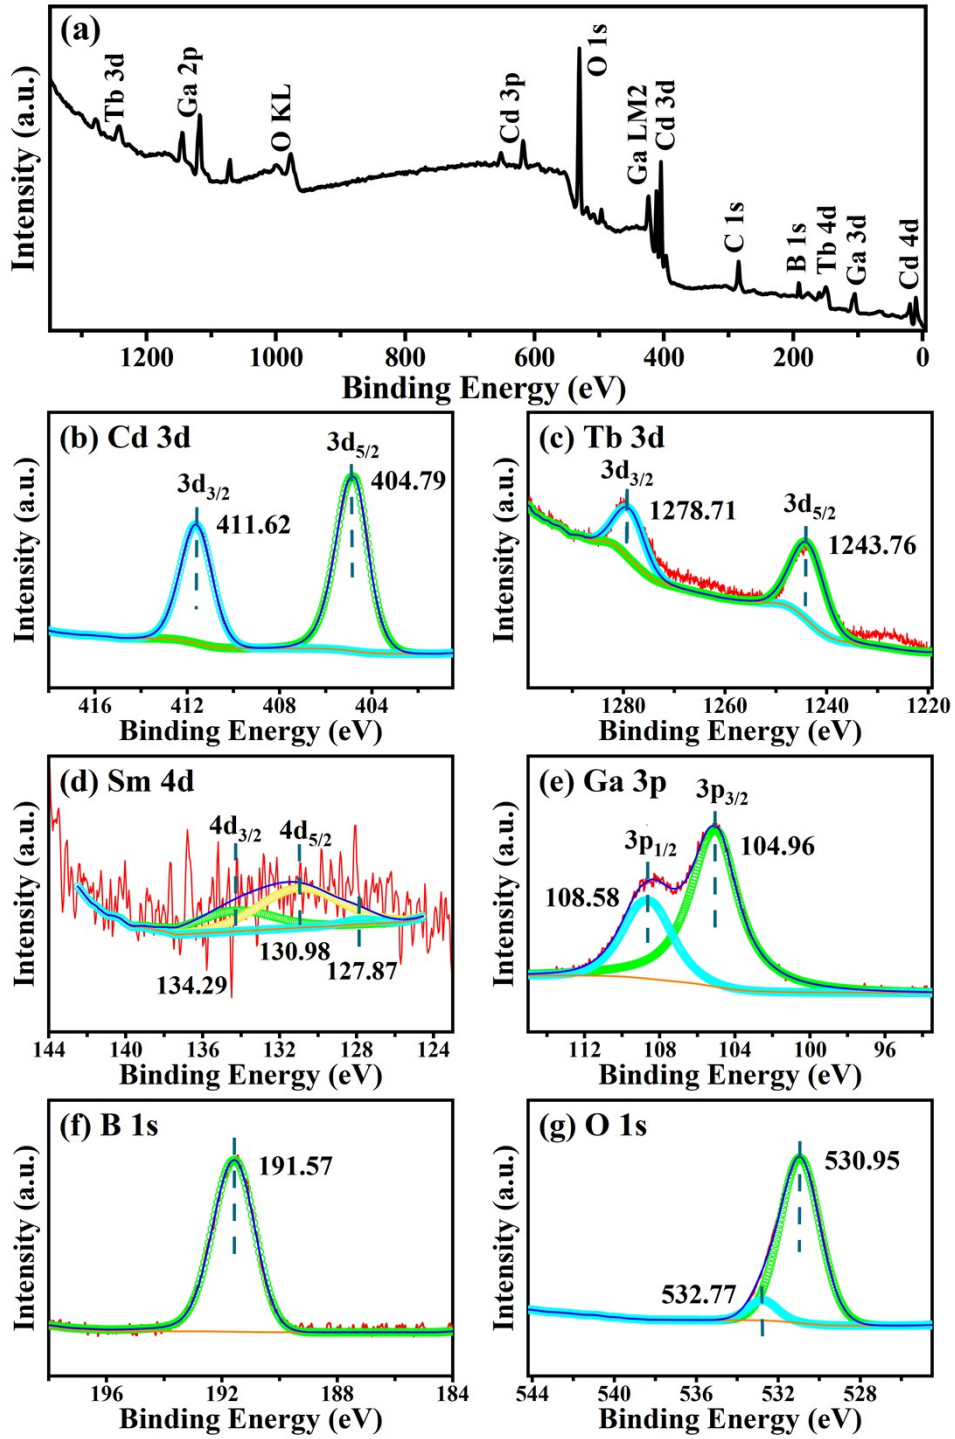

**Fig. S5** Survey (a) and core-level spectra of Cd 3d (b), Tb 3d (c), Sm 4d (d), Ga 3p (e), B 1s (f) and O 1s (g) for  $\text{CdTb}_{0.995}\text{Sm}_{0.005}\text{GaB}_2\text{O}_7$ .

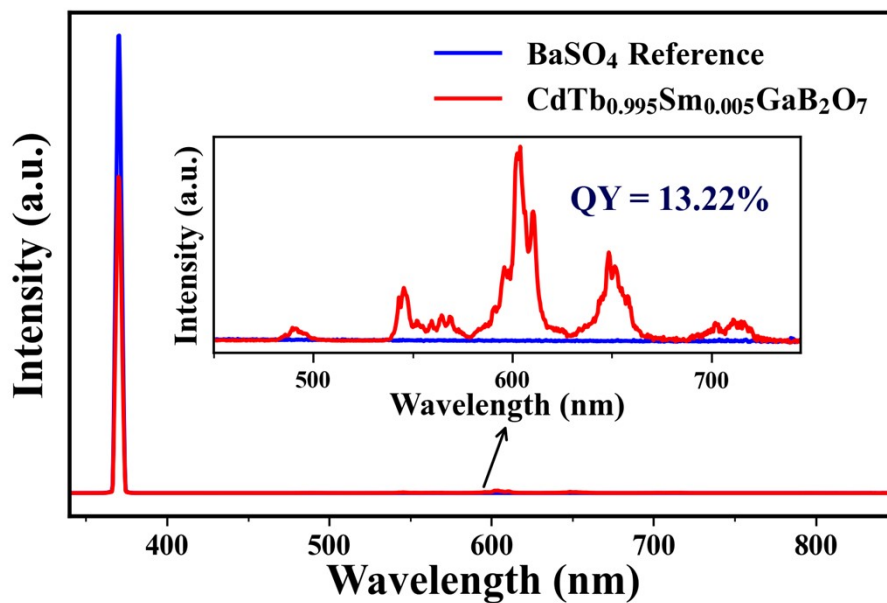

**Fig. S6** The excitation line of  $\text{BaSO}_4$  reference and the PL spectrum of the  $\text{CdTb}_{0.995}\text{Sm}_{0.005}\text{GaB}_2\text{O}_7$  phosphor collected using an integrating sphere ( $\lambda_{\text{ex}} = 370$  nm); inset shows a local magnification of the PL spectrum.
